# Supplementary material for: Injectable PEDOT:PSS/cholinium ionic liquid mixed conducting materials for electrocardiogram recordings
Source: Royal Society of Chemistry journal article supplement (doi:10.1039/d2tc03248a), 2022-01-01
Supplement: d2tc03248a1.pdf [file d2tc03248a1.pdf]

Electronic Supplementary Information

## Injectable PEDOT:PSS/cholinium ionic liquid mixed conducting materials for electrocardiogram recordings

Nerea Casado,<sup>\*a</sup> Sara Zendegi,<sup>a</sup> Liliana C. Tomé,<sup>b</sup> Santiago Velasco-Bosom,<sup>c</sup> Ana Aguzin,<sup>d</sup> Matias Picchio,<sup>d</sup> Miryam Criado-Gonzalez,<sup>a</sup> George G. Malliaras,<sup>c</sup> Maria Forsyth,<sup>a,e,f</sup> David Mecerreyes.<sup>a,f</sup>

<sup>a</sup>POLYMAT, University of the Basque Country UPV/EHU, Avda. Tolosa 72, Donostia-San Sebastián, Gipuzkoa, 20018 Spain.

<sup>b</sup>LAQV-REQUIMTE, Department of Chemistry, NOVA School of Science and Technology, FCT NOVA, Universidade NOVA de Lisboa, 2829-516 Caparica, Portugal.

<sup>c</sup>Electrical Engineering Division, Department of Engineering, University of Cambridge, 9 JJ Thomson Ave, Cambridge, CB3 0FA UK.

<sup>d</sup>Instituto de Desarrollo Tecnológico para la Industria Química (INTEC), CONICET, Güemes 3450, Santa Fe 3000, Argentina.

<sup>e</sup>ARC Centre of Excellence for Electromaterials Science (ACES), Deakin University, Burwood 3125, Victoria, Australia

<sup>f</sup>IKERBASQUE, Basque Foundation for Science, Plaza Euskadi 5, 48009, Bilbao, Spain.

Corresponding author:

Nerea Casado (E-mail: [nerea.casado@ehu.eus](mailto:nerea.casado@ehu.eus))

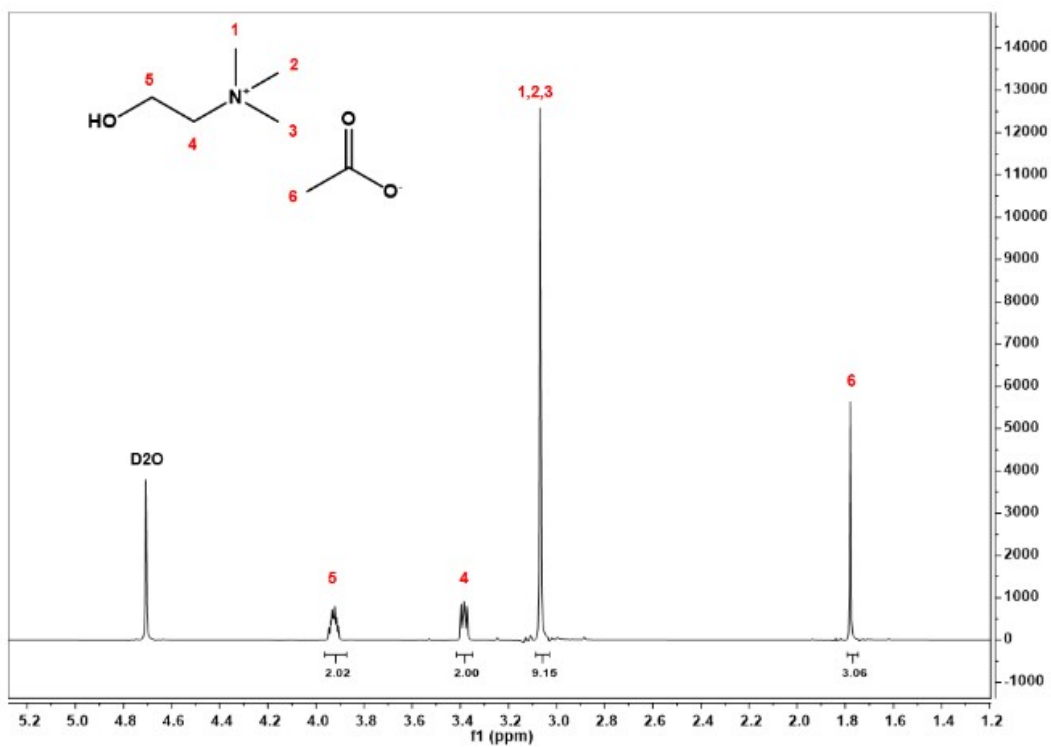

Figure S1  $^1\text{H}$  NMR spectra of [Ch][Ac] ionic liquid.

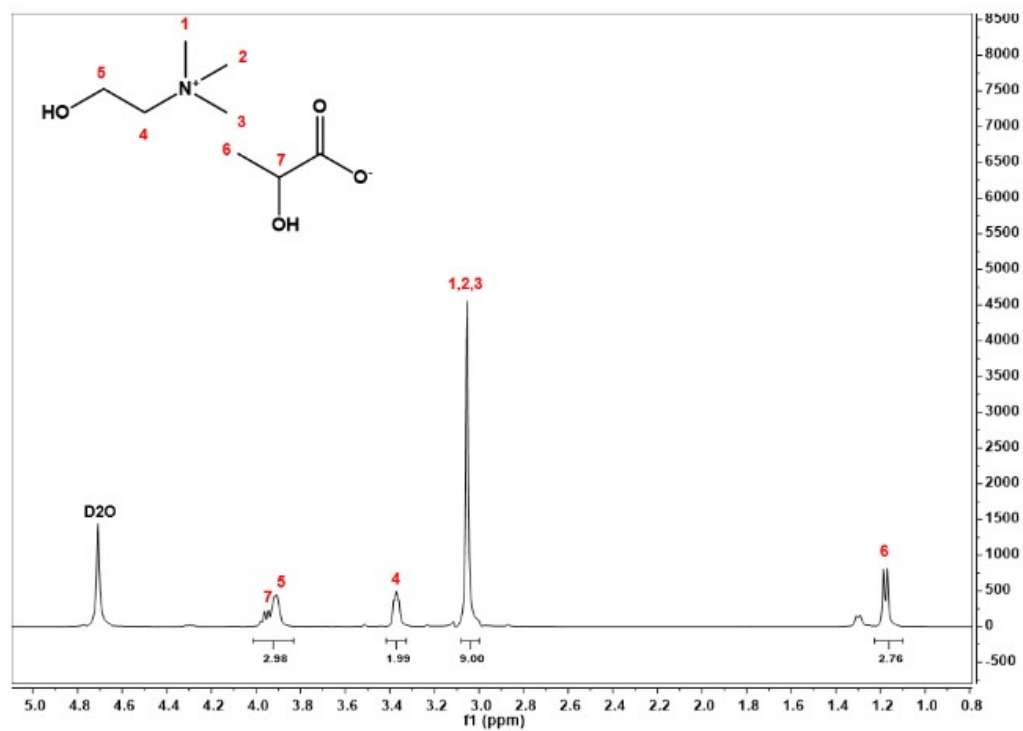

Figure S2  $^1\text{H}$  NMR spectra of [Ch][Lac] ionic liquid.

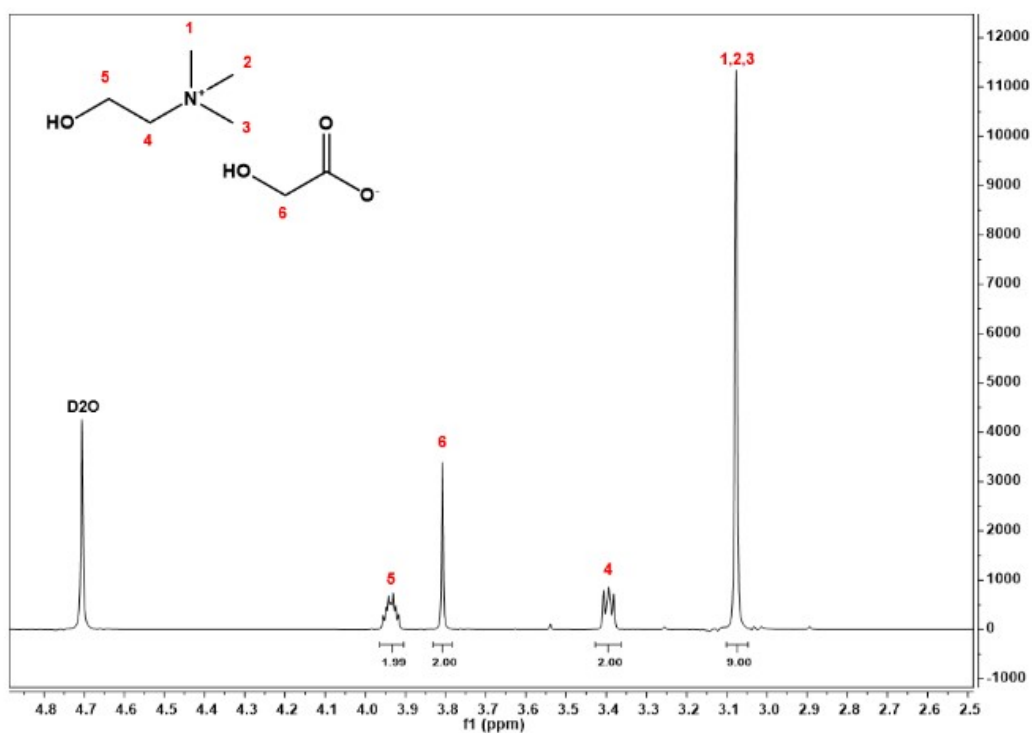

Figure S3  $^1\text{H}$  NMR spectra of [Ch][Glyco]

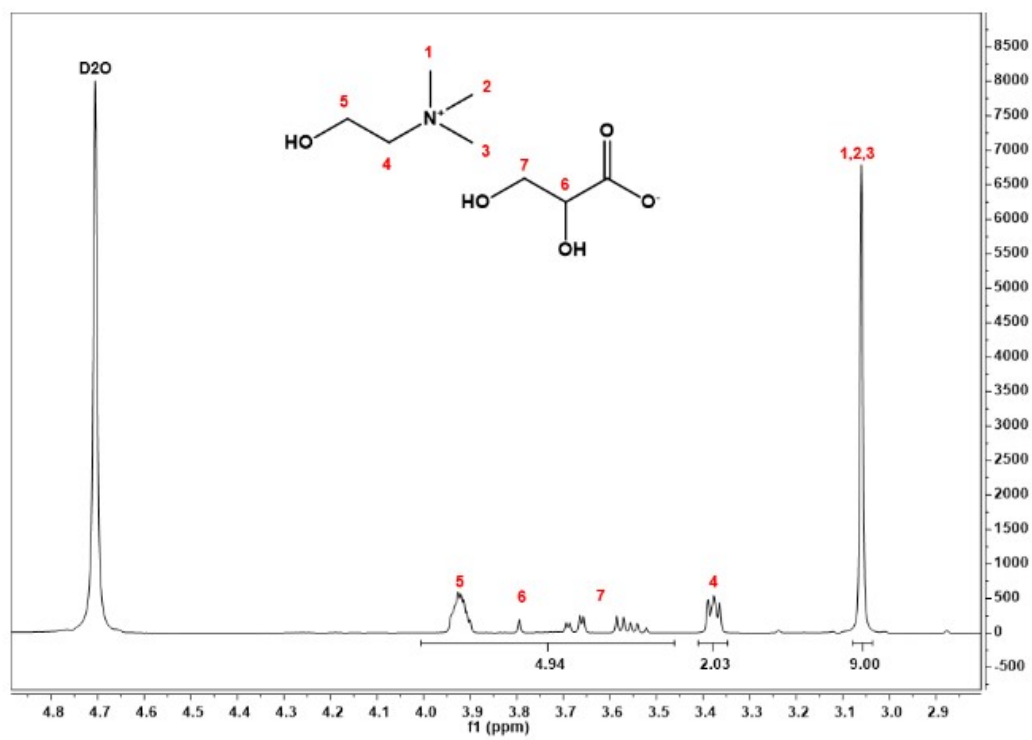

Figure S4  $^1\text{H}$  NMR spectra of [Ch][Glyce]

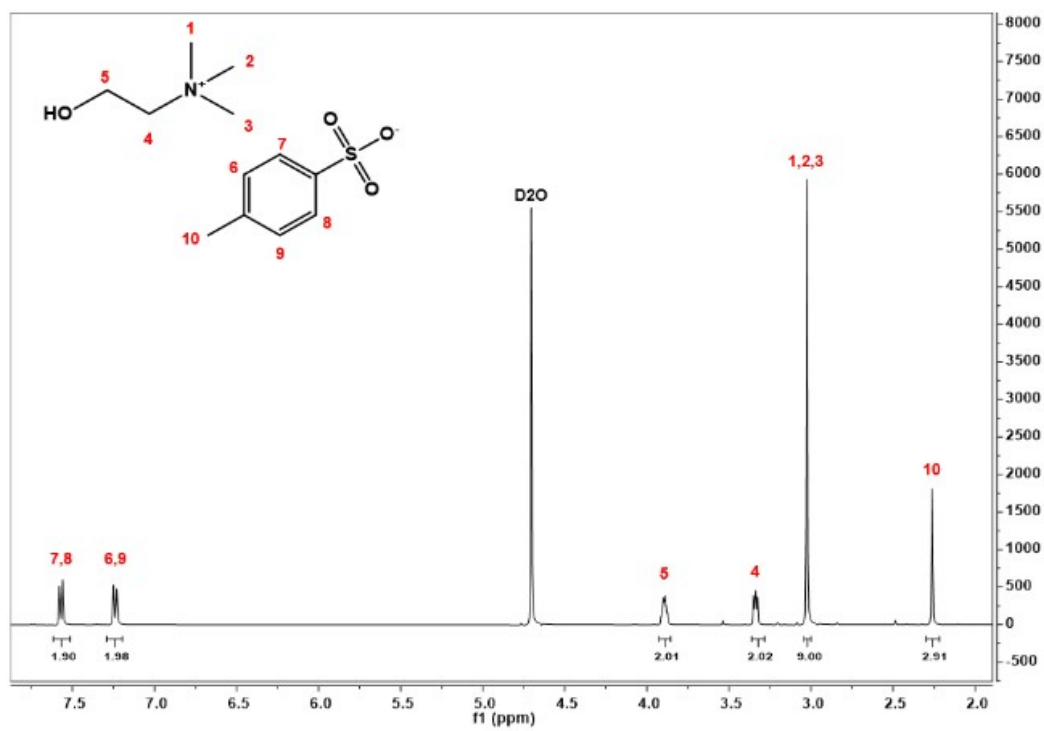

Figure S5 <sup>1</sup>H NMR spectra of [Ch][Tos]

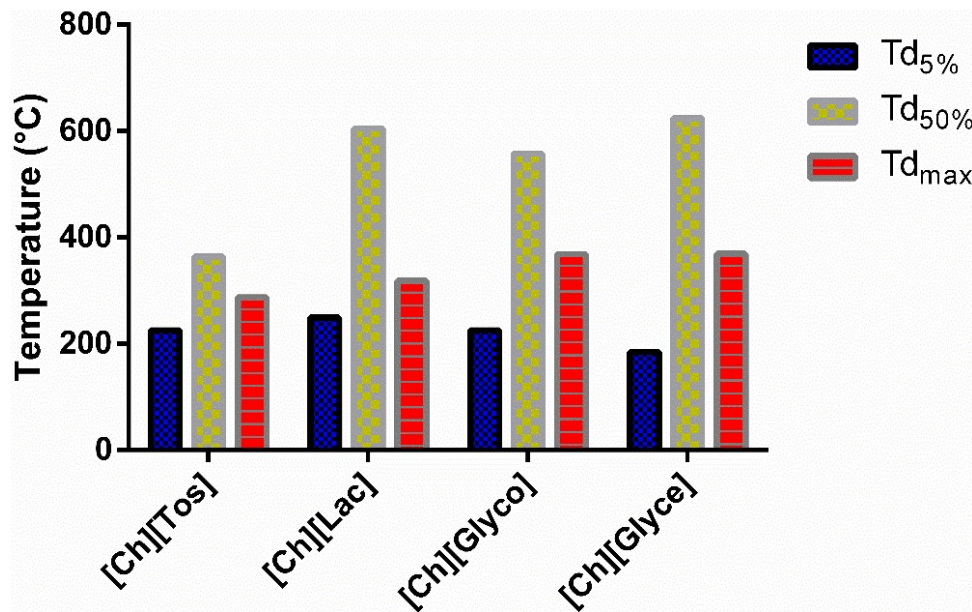

Figure S6 Decomposition temperatures at 5% (Td<sub>5%</sub>) and (Td<sub>50%</sub>) of weight loss; and maximum decomposition temperature (Td<sub>max</sub>) for the as-prepared composite films.

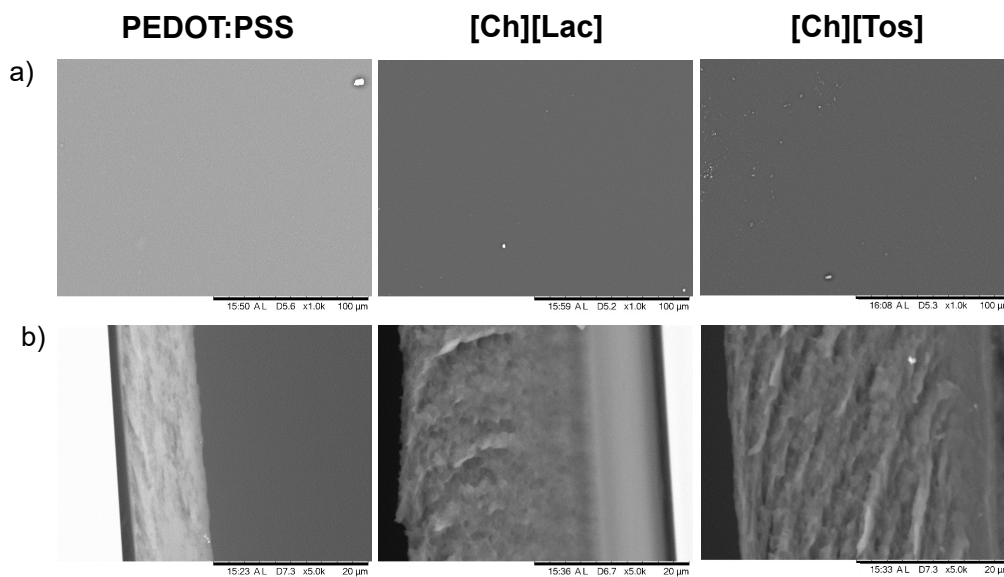

Figure S7 SEM images of pure PEDOT:PSS, PEDOT:PSS/[Ch][Lac] 60/40 and PEDOT:PSS/[Ch][Tos] 60/40 composite films of a) surfaces and b) cross-sections.

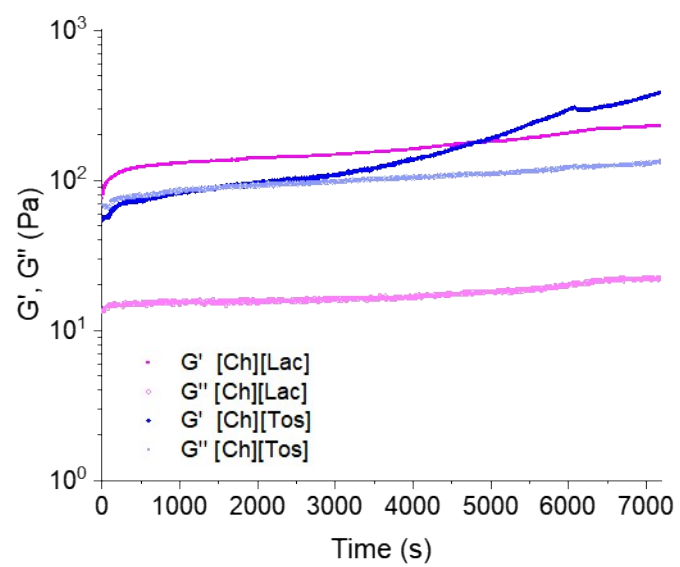

Figure S8 Storage modulus ( $G'$ ) and loss modulus ( $G''$ ) of PEDOT:PSS with 40 wt% of [Ch][Lac] or [Ch][Tos] ILs as a function of time.
